# Supplementary material
Source: Royal Society of Chemistry journal article supplement (doi:10.1039/d6ce00328a)
Supplement: d6ce00328a1.pdf [file d6ce00328a1.pdf]

## Supporting Information

### **Doping Concentration-Dependent Structural Evolution and Blue Shift in Indium-Based Organic–Inorganic Halide Hybrids**

Xue-Jian Feng<sup>#</sup>, Jing-Xuan Hao<sup>#</sup>, Meng-Qi Wang, Xin-Xin Pan, Meng-Yuan Zhang,  
Hao-Yu Hao, Dian-Hao Guo, Qi Zhang and Yue Wu\*

*Shandong Provincial Key Laboratory/Collaborative Innovation Center of Chemical Energy Storage and Novel Cell Technology, College of Chemistry and Chemical Engineering, Liaocheng University, Liaocheng 252059, China*

E-mail address: ywu\_lcu@163.com

**Table S1.** Single X-ray diffraction crystallographic data of (BZM)<sub>3</sub>InCl<sub>6</sub>, (BZM)<sub>3</sub>InCl<sub>6</sub>:0.2Sb<sup>3+</sup>, and (BZM)<sub>5</sub>In<sub>2</sub>Cl<sub>11</sub>·H<sub>2</sub>O:0.5Sb<sup>3+</sup>.

| Compounds                           | (BZM) <sub>3</sub> InCl <sub>6</sub>                                           | (BZM) <sub>3</sub> InCl <sub>6</sub> :0.2Sb <sup>3+</sup>                                           | (BZM) <sub>5</sub> In <sub>2</sub> Cl <sub>11</sub> ·H <sub>2</sub> O:0.5Sb <sup>3+</sup>                                             |
|-------------------------------------|--------------------------------------------------------------------------------|-----------------------------------------------------------------------------------------------------|---------------------------------------------------------------------------------------------------------------------------------------|
| <b>Moiety formula</b>               | (C <sub>7</sub> H <sub>8</sub> N <sub>2</sub> ) <sub>3</sub> InCl <sub>6</sub> | (C <sub>7</sub> H <sub>8</sub> N <sub>2</sub> ) <sub>3</sub> InCl <sub>6</sub> :0.2Sb <sup>3+</sup> | (C <sub>7</sub> H <sub>8</sub> N <sub>2</sub> ) <sub>5</sub> In <sub>2</sub> Cl <sub>11</sub><br>H <sub>2</sub> O:0.5Sb <sup>3+</sup> |
| <b>Sum formula</b>                  | C <sub>21</sub> H <sub>24</sub> Cl <sub>6</sub> InN <sub>6</sub>               | C <sub>21</sub> H <sub>24</sub> Cl <sub>6</sub> InN <sub>6</sub>                                    | C <sub>35</sub> H <sub>40</sub> Cl <sub>11</sub> In <sub>2</sub> N <sub>10</sub> O <sub>2</sub>                                       |
| <b>Temperature/K</b>                | 293                                                                            | 293                                                                                                 | 293                                                                                                                                   |
| <b>Crystal system</b>               | Monoclinic                                                                     | Monoclinic                                                                                          | Monoclinic                                                                                                                            |
| <b>Space group</b>                  | <i>P</i> 2 <sub>1</sub> /n                                                     | <i>P</i> 2 <sub>1</sub> /n                                                                          | <i>P</i> 2 <sub>1</sub> /c                                                                                                            |
| <b><i>a</i> / Å</b>                 | 13.1327(5)                                                                     | 13.0041(15)                                                                                         | 17.453(4)                                                                                                                             |
| <b><i>b</i> / Å</b>                 | 15.7996(6)                                                                     | 15.6828(17)                                                                                         | 23.232(5)                                                                                                                             |
| <b><i>c</i> / Å</b>                 | 27.3097(10)                                                                    | 27.062(3)                                                                                           | 12.351(3)                                                                                                                             |
| <b><i>α</i> / deg</b>               | 90.00(0)                                                                       | 90.00(0)                                                                                            | 90.00(0)                                                                                                                              |
| <b><i>β</i> / deg</b>               | 98.928(4)                                                                      | 99.008(3)                                                                                           | 92.07(3)                                                                                                                              |
| <b><i>γ</i> / deg</b>               | 90.00(0)                                                                       | 90.00(0)                                                                                            | 90.00(0)                                                                                                                              |
| <b>Volume / Å<sup>3</sup></b>       | 5597.87                                                                        | 5450.97                                                                                             | 5004.67                                                                                                                               |
| <b><i>Z</i></b>                     | 8                                                                              | 8                                                                                                   | 4                                                                                                                                     |
| <b><i>ρ</i> / g·cm<sup>-3</sup></b> | 1.633                                                                          | 1.677                                                                                               | 1.650                                                                                                                                 |
| <b><i>F</i>(000)</b>                | 2744.0                                                                         | 2744.0                                                                                              | 2460.0                                                                                                                                |
| <b>Crystal size / mm</b>            | 0.38*0.26*0.19                                                                 | 0.41*0.22*0.16                                                                                      | 0.32*0.27*0.18                                                                                                                        |
| <b><i>μ</i> / mm<sup>-1</sup></b>   | 1.439                                                                          | 1.478                                                                                               | 1.628                                                                                                                                 |
| <b>Radiation</b>                    | Mo Kα ( <i>λ</i> =<br>0.71073 Å)                                               | Mo Kα ( <i>λ</i> = 0.71073 Å)                                                                       | Mo Kα ( <i>λ</i> = 0.71073 Å)                                                                                                         |
| <b>Final <i>R</i></b>               | <i>R</i> <sub>1</sub> =0.0422                                                  | <i>R</i> <sub>1</sub> =0.0556                                                                       | <i>R</i> <sub>1</sub> =0.0723                                                                                                         |
| <b>indexes[all data]</b>            | <i>wR</i> <sub>2</sub> =0.0884                                                 | <i>wR</i> <sub>2</sub> =0.1416                                                                      | <i>wR</i> <sub>2</sub> =0.2573                                                                                                        |
| <b>GOF</b>                          | 1.047                                                                          | 1.037                                                                                               | 1.153                                                                                                                                 |

$$(a) R_1 = \frac{\sum |F_o - F_c|}{\sum F_o}$$

$$(b) wR_2 = \frac{\sum [w(F_o^2 - F_c^2)]}{\sum [w(F_o^2)]}^{1/2}$$

**Table S2.** Selected bond angle (°) of (BZM)<sub>3</sub>InCl<sub>6</sub>.

| Atom1 | Atom2 | Atom3 | Bond angle (°) |
|-------|-------|-------|----------------|
| C11   | In1   | Cl2   | 178.37         |
| C11   | In1   | Cl5   | 88.40          |
| C11   | In1   | Cl3   | 91.68          |
| C11   | In1   | Cl6   | 93.00          |
| C11   | In1   | Cl4   | 91.37          |
| C12   | In1   | Cl5   | 91.16          |
| C12   | In1   | Cl3   | 89.88          |
| C12   | In1   | Cl6   | 87.49          |
| C12   | In1   | Cl4   | 87.06          |
| C15   | In1   | Cl3   | 88.70          |
| C15   | In1   | Cl6   | 177.79         |
| C15   | In1   | Cl4   | 90.65          |
| C13   | In1   | Cl6   | 89.55          |
| C13   | In1   | Cl4   | 176.86         |
| Cl6   | In1   | Cl4   | 91.03          |
| C17   | In2   | Cl9   | 90.62          |
| C17   | In2   | Cl10  | 90.03          |
| C17   | In2   | Cl11  | 89.24          |
| C17   | In2   | Cl12  | 88.89          |
| C17   | In2   | Cl8   | 178.06         |
| C19   | In2   | Cl10  | 177.70         |
| C19   | In2   | Cl11  | 90.02          |
| C19   | In2   | Cl12  | 90.11          |
| C19   | In2   | Cl8   | 88.04          |
| Cl10  | In2   | Cl11  | 92.20          |
| Cl10  | In2   | Cl12  | 87.70          |
| Cl10  | In2   | Cl8   | 91.37          |
| Cl11  | In2   | Cl12  | 178.13         |
| Cl11  | In2   | Cl8   | 89.36          |
| Cl12  | In2   | Cl8   | 92.51          |

**Table S3.** Selected bond length (Å) of in (BZM)<sub>3</sub>InCl<sub>6</sub>.

| Atom1 | Atom2 | Bond length (Å) |
|-------|-------|-----------------|
| In1   | Cl1   | 2.536           |
| In1   | Cl2   | 2.587           |
| In1   | Cl5   | 2.509           |
| In1   | Cl3   | 2.480           |
| In1   | Cl6   | 2.505           |
| In1   | Cl4   | 2.465           |
| In2   | Cl7   | 2.579           |
| In2   | Cl9   | 2.549           |
| In2   | Cl10  | 2.526           |
| In2   | Cl11  | 2.457           |
| In2   | Cl12  | 2.457           |
| In2   | Cl8   | 2.533           |

**Table S4.** Selected bond angle (°) of (BZM)<sub>3</sub>InCl<sub>6</sub>:0.2Sb<sup>3+</sup>.

| Atom1 | Atom2 | Atom3 | Bond angle (°) |
|-------|-------|-------|----------------|
| C11   | In1   | C14   | 178.46         |
| C11   | In1   | C13   | 88.58          |
| C11   | In1   | C16   | 92.76          |
| C11   | In1   | C12   | 91.65          |
| C11   | In1   | C15   | 91.31          |
| C14   | In1   | C13   | 91.02          |
| C14   | In1   | C16   | 87.68          |
| C14   | In1   | C12   | 89.83          |
| C14   | In1   | C15   | 87.21          |
| C13   | In1   | C16   | 177.82         |
| C13   | In1   | C12   | 88.71          |
| C13   | In1   | C15   | 90.63          |
| C16   | In1   | C12   | 89.52          |
| C16   | In1   | C15   | 91.06          |
| C12   | In1   | C15   | 176.95         |
| Cl12  | Sb1   | Cl11  | 90.69          |
| Cl12  | Sb1   | Cl9   | 178.04         |
| Cl12  | Sb1   | Cl8   | 89.97          |
| Cl12  | Sb1   | Cl10  | 89.28          |
| Cl12  | Sb1   | Cl7   | 88.91          |
| Cl11  | Sb1   | Cl9   | 87.97          |
| Cl11  | Sb1   | Cl8   | 177.67         |
| Cl11  | Sb1   | Cl10  | 90.04          |
| Cl11  | Sb1   | Cl7   | 90.03          |
| Cl9   | Sb1   | Cl8   | 91.42          |
| Cl9   | Sb1   | Cl10  | 89.29          |
| Cl9   | Sb1   | Cl7   | 92.52          |
| Cl8   | Sb1   | Cl9   | 92.20          |
| Cl8   | Sb1   | Cl9   | 87.75          |
| Cl10  | Sb1   | Cl9   | 178.19         |

**Table S5.** Selected bond length (Å) of (BZM)<sub>3</sub>InCl<sub>6</sub>:0.2Sb<sup>3+</sup>.

| Atom1 | Atom2 | Bond length (Å) |
|-------|-------|-----------------|
| In1   | Cl1   | 2.51            |
| In1   | Cl4   | 2.57            |
| In1   | Cl3   | 2.49            |
| In1   | Cl6   | 2.48            |
| In1   | Cl2   | 2.46            |
| In1   | Cl5   | 2.44            |
| Sb1   | Cl12  | 2.55            |
| Sb1   | Cl11  | 2.53            |
| Sb1   | Cl9   | 2.51            |
| Sb1   | Cl8   | 2.51            |
| Sb1   | Cl10  | 2.43            |
| Sb1   | Cl7   | 2.43            |

**Table S6.** Selected bond angle (°) of (BZM)<sub>5</sub>In<sub>2</sub>Cl<sub>11</sub>·H<sub>2</sub>O:0.5Sb<sup>3+</sup>.

| Atom1 | Atom2 | Atom3 | Bond angle (°) |
|-------|-------|-------|----------------|
| Cl1   | In1   | Cl6   | 87.9           |
| Cl1   | In1   | Cl4   | 175.9          |
| Cl6   | In1   | Cl4   | 89.6           |
| Cl1   | In1   | Cl3   | 90.0           |
| Cl6   | In1   | Cl3   | 177.9          |
| Cl4   | In1   | Cl3   | 92.4           |
| Cl1   | In1   | Cl2   | 91.8           |
| Cl6   | In1   | Cl2   | 92.2           |
| Cl4   | In1   | Cl2   | 91.6           |
| Cl3   | In1   | Cl2   | 88.5           |
| Cl1   | In1   | Cl5   | 89.8           |
| Cl6   | In1   | Cl5   | 92.4           |
| Cl4   | In1   | Cl5   | 86.9           |
| Cl3   | In1   | Cl5   | 86.9           |
| Cl2   | In1   | Cl5   | 175.1          |
| Cl7   | Sb1   | Cl11  | 91             |
| Cl7   | Sb1   | Cl10  | 89.6           |
| Cl11  | Sb1   | Cl10  | 89.2           |
| Cl7   | Sb1   | Cl8   | 86.8           |
| Cl11  | Sb1   | Cl8   | 87.6           |
| Cl10  | Sb1   | Cl8   | 175.1          |

**Table S7.** Selected bond length ( $\text{\AA}$ ) of  $(\text{BZM})_5\text{In}_2\text{Cl}_{11}\cdot\text{H}_2\text{O}:0.5\text{Sb}^{3+}$ .

| Atom1 | Atom2 | Bond length ( $\text{\AA}$ ) |
|-------|-------|------------------------------|
| In1   | Cl2   | 2.51                         |
| In1   | Cl5   | 2.54                         |
| In1   | Cl3   | 2.49                         |
| In1   | Cl4   | 2.49                         |
| In1   | Cl1   | 2.46                         |
| In1   | Cl6   | 2.49                         |
| Sb1   | Cl10  | 2.54                         |
| Sb1   | Cl8   | 2.68                         |
| Sb1   | Cl11  | 2.38                         |
| Sb1   | Cl7   | 2.37                         |

**Table S8.** The degree of distortion ( $\Delta d$ ) of  $(\text{BZM})_5\text{In}_2\text{Cl}_{11}\cdot\text{H}_2\text{O}:0.5\text{Sb}^{3+}$ .

| Compounds     | $\Delta d (\times 10^{-4})$ |
|---------------|-----------------------------|
| 0 Sb doping   | 3.26/2.50                   |
| 0.2 Sb doping | 3.52/2.76                   |
| 0.5 Sb doping | 126.7/0.945                 |

**Table S9.** Inductively coupled plasma (ICP) optical emission spectrometry of  $(\text{BZM})_3\text{InCl}_6$  and  $(\text{BZM})_5\text{In}_2\text{Cl}_{11}\cdot\text{H}_2\text{O}:0.7\text{Sb}^{3+}$ .

| sample name                                                                        | Test elements | Sample element content $C_x(\text{mg/kg})$ | Sample element content $w(\%)$ | Sample element content (n) | n(Sb)/n(In) |
|------------------------------------------------------------------------------------|---------------|--------------------------------------------|--------------------------------|----------------------------|-------------|
| $(\text{BZM})_3\text{InCl}_6$                                                      | In            | 148910.82                                  | 14.8911%                       | 0.1297                     | 0           |
| $(\text{BZM})_5\text{In}_2\text{Cl}_{11}\cdot\text{H}_2\text{O}:0.7\text{Sb}^{3+}$ | In            | 69777.11                                   | 6.9777%                        | 0.06077                    | 1.417       |
|                                                                                    | Sb            | 104876.64                                  | 10.4877%                       | 0.08613                    |             |

**Table S10** CCT and CIE Chromaticity Coordinates of the red LED.

| Current (mA) | CCT (K) | CIE $x$ | CIE $y$ |
|--------------|---------|---------|---------|
| 20           | 2256    | 0.519   | 0.4435  |
| 40           | 2310    | 0.5141  | 0.4445  |
| 60           | 2305    | 0.5154  | 0.4458  |
| 80           | 2305    | 0.5157  | 0.4463  |
| 100          | 2317    | 0.5149  | 0.4468  |
| 120          | 2358    | 0.5119  | 0.4487  |
| 140          | 2358    | 0.5119  | 0.4487  |
| 160          | 2256    | 0.5185  | 0.4427  |
| 180          | 2207    | 0.5209  | 0.4384  |
| 200          | 2208    | 0.5207  | 0.4384  |

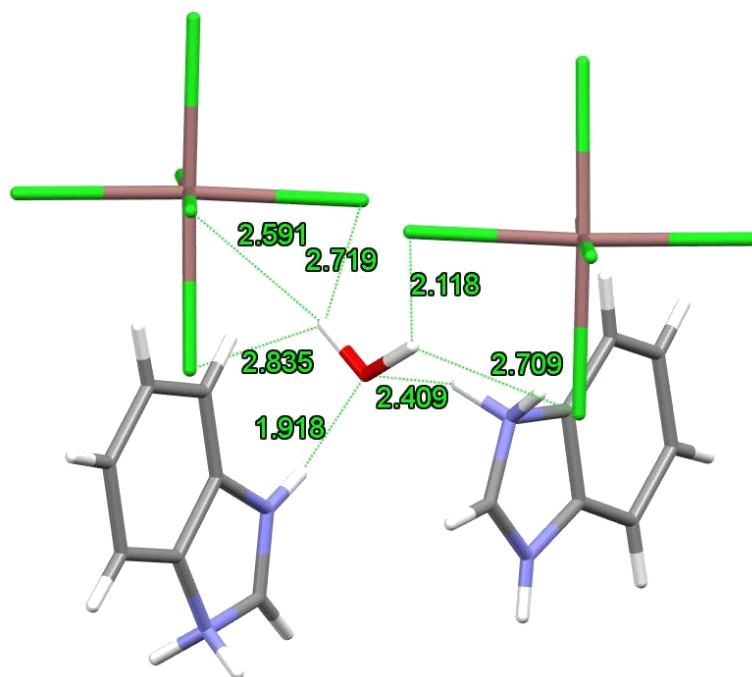

**Figure S1.** Weak intermolecular interactions such as  $O \cdots H-N$  and  $Cl \cdots H-O$  contacts in the structure of  $(BZM)_5In_2Cl_{11} \cdot H_2O : 0.5Sb^{3+}$ .

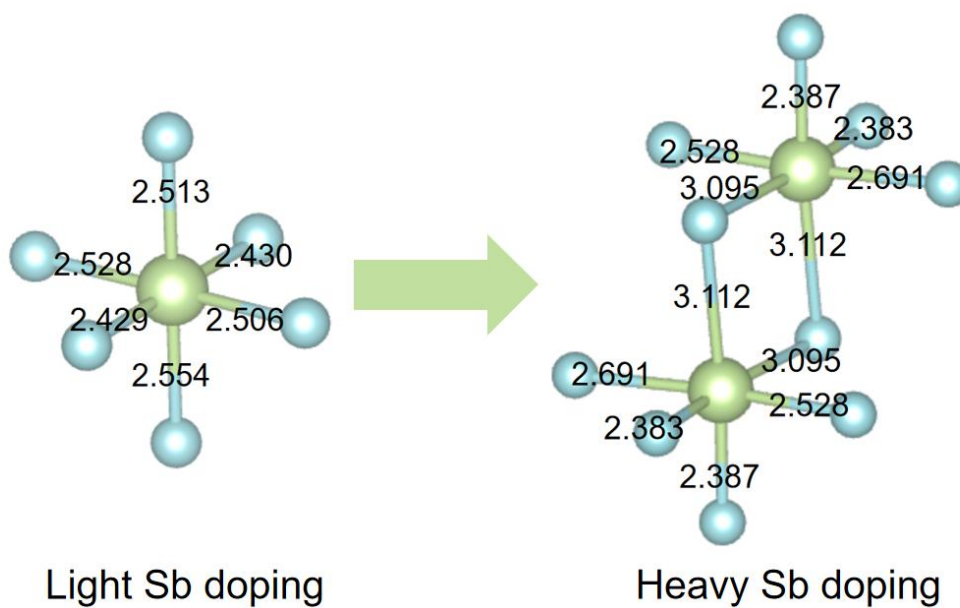

**Figure S2.** Variations of Sb - Cl Bonds under Different Sb Doping Levels.

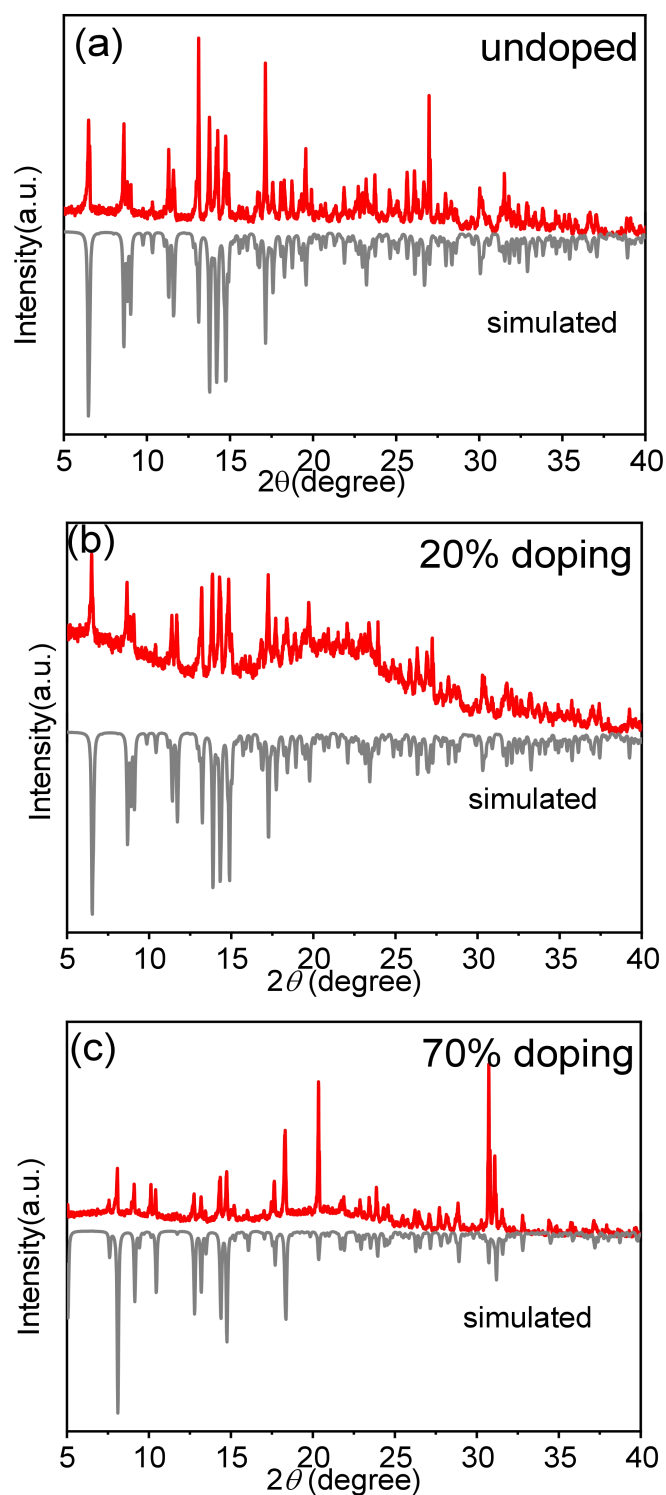

**Figure S3.** PXR D pattern and the simulated patterns derived from the corresponding single-crystal structures of (a)  $(\text{BZM})_3\text{InCl}_6$ , (b)  $(\text{BZM})_3\text{InCl}_6:0.2\text{Sb}^{3+}$  and (c)  $(\text{BZM})_5\text{In}_2\text{Cl}_{11}\cdot\text{H}_2\text{O}:0.5\text{Sb}^{3+}$ , confirming the high phase purity of the synthesized materials.

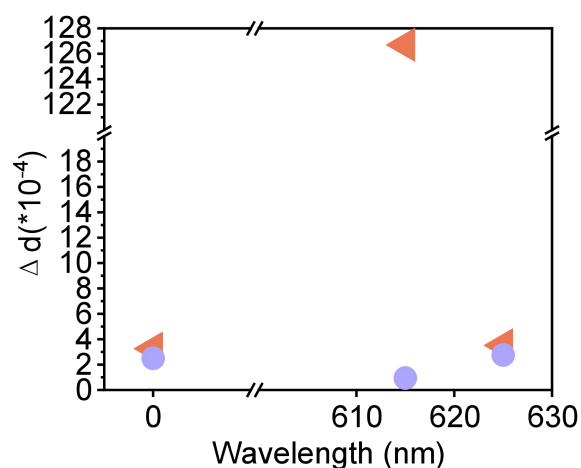

**Figure S4.** Correlation between the distortion parameter  $\Delta d$  and the emission peak energy for  $(\text{BZM})_3\text{InCl}_6:x\text{Sb}^{3+}$  with  $x = 0\%$ ,  $20\%$ , and  $50\%$ .

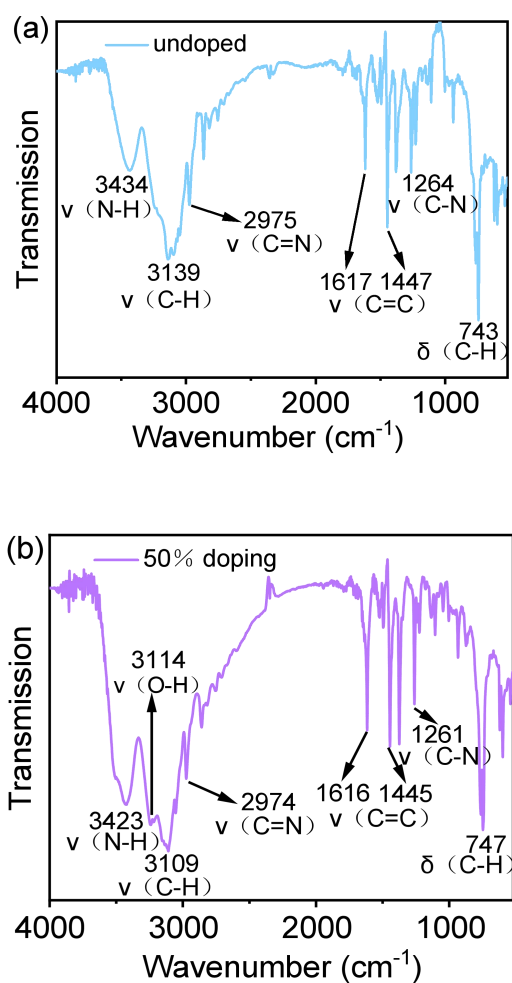

**Figure S5.** The Fourier transform infrared spectrum of (a)  $(\text{BZM})_3\text{InCl}_6$  and (b)  $(\text{BZM})_5\text{In}_2\text{Cl}_{11}\cdot\text{H}_2\text{O}:0.5\text{Sb}^{3+}$ .

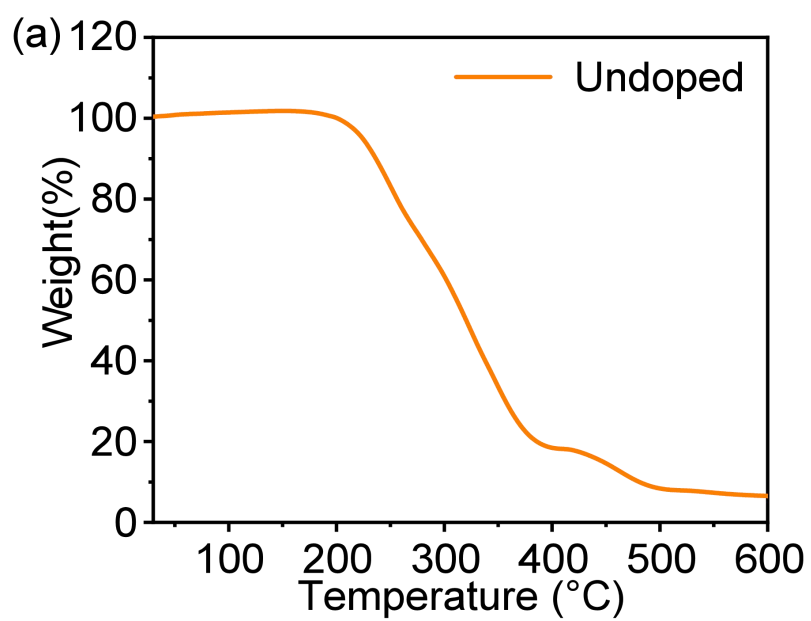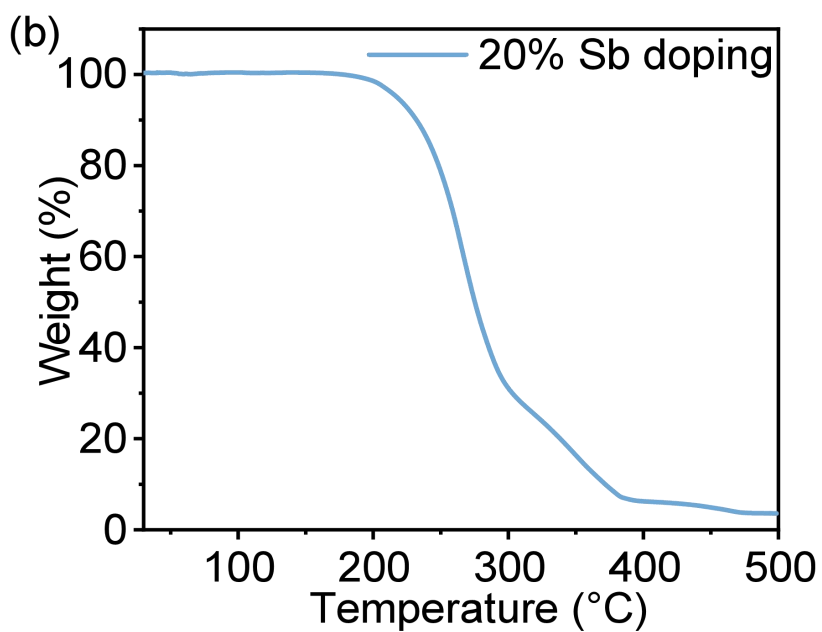

**Figure S6.** TGA curve of (a)  $(\text{BZM})_3\text{InCl}_6$  and (b)  $(\text{BZM})_3\text{InCl}_6:0.2\text{Sb}^{3+}$ .

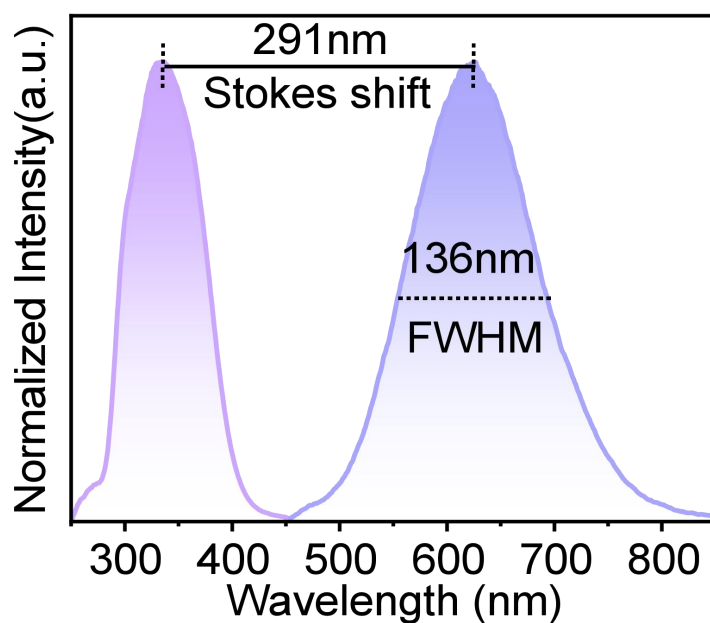

**Figure S7.** PL and PLE spectra of  $(\text{BZM})_3\text{InCl}_6:0.2\text{Sb}^{3+}$ , showing a large FWHM of 136 nm and a significant Stokes shift of 291 nm.

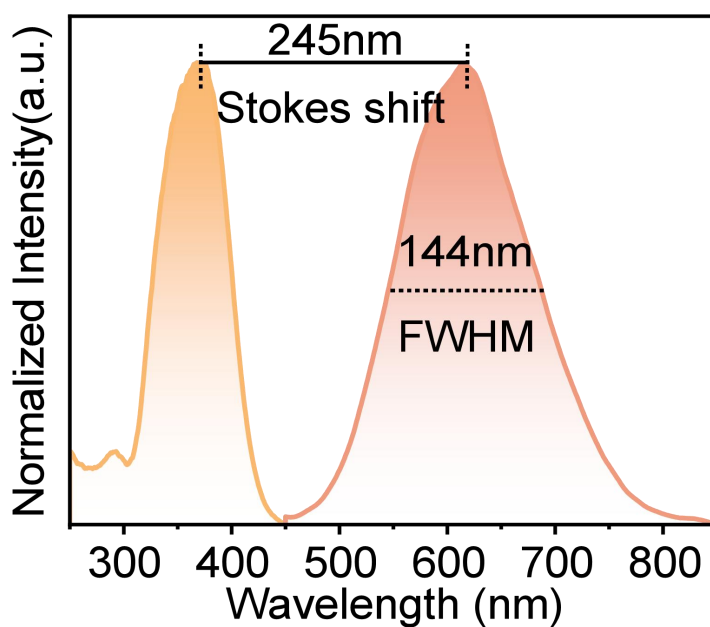

**Figure S8.** PL and PLE spectra of  $(\text{BZM})_5\text{In}_2\text{Cl}_{11}\cdot\text{H}_2\text{O}:0.5\text{Sb}^{3+}$ , showing a large FWHM of 144 nm and a significant Stokes shift of 245 nm.

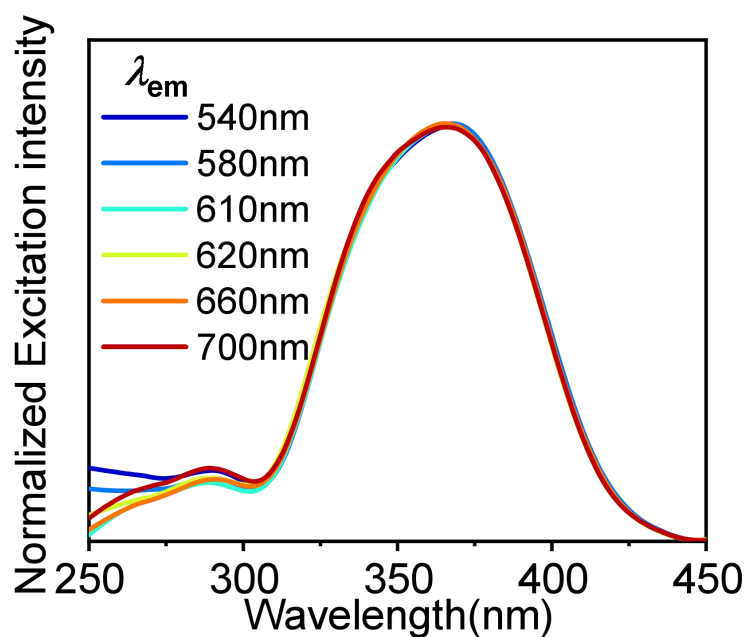

**Figure S9.** Emission wavelength-dependent excitation spectra of  $(\text{BZM})_3\text{InCl}_6:0.2\text{Sb}^{3+}$  monitored between 540 and 700 nm at room temperature.

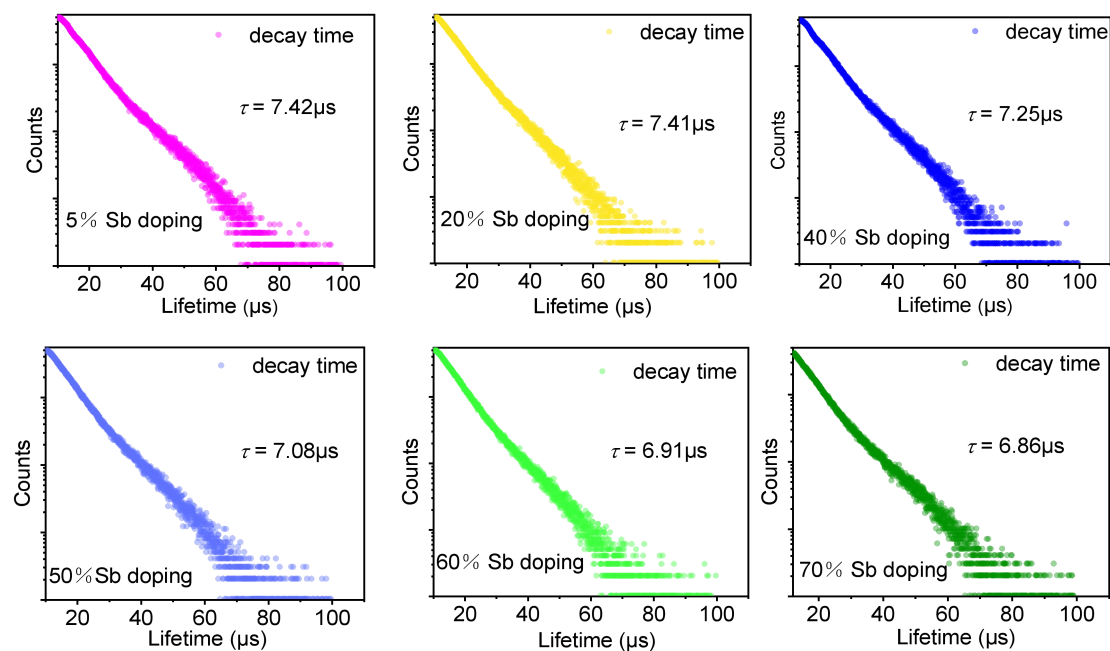

**Figure S10.** The time-resolved PL decays time all fell within the range of 6.86–7.42  $\mu\text{s}$  for both  $(\text{BZM})_3\text{InCl}_6:x\text{Sb}^{3+}$  ( $0 \leq x < 0.4$ ) and  $(\text{BZM})_5\text{In}_2\text{Cl}_{11} \cdot \text{H}_2\text{O}:x\text{Sb}^{3+}$  ( $0.4 \leq x \leq 0.7$ )
